# Supplementary material
Source: MDPI journal article supplement (https://www.mdpi.com/2311-5637/8/7/336)
Supplement: s1 [file s1]

**Comparative genome analysis of two heterotrophic nitrifying  
*Pseudomonas putida* strains isolated from freshwater shrimp ponds  
in Soc Trang province**

**Thanh Trung Tran<sup>1,2,3</sup>, Nathan J. Bott<sup>1</sup>, Rebecca van Gelderen<sup>1</sup>, Nam  
Trung Nguyen<sup>2,3</sup>, Phuong Minh Thi Chu<sup>2</sup>, Ha Hoang Chu<sup>2,3,\*</sup>**

<sup>1</sup> Centre for Environmental Sustainability and Remediation, School of Science,  
Royal Melbourne Institute of Technology University, PO Box 71, Bundoora  
Victoria 3083, Australia; trantrungthanh3t@gmail.com (T.T.T.);  
nathan.bott@rmit.edu.au (N.J.B.); rebecca.vangelderen@rmit.edu.au (R.V.G)

<sup>2</sup> National Key Laboratory of Gene Technology, Institute of Biotechnology,  
Vietnam Academy of Science and Technology, 18 Hoang Quoc Viet, Cau Giay,  
Hanoi 100000, Vietnam; nam@ibt.ac.vn(N.T.N.);  
chuthiminhphuong31@gmail.com (P.M.T.C.)

<sup>3</sup> Faculty of Biotechnology, Graduate University of Science and Technology,  
Vietnam Academy of Science and Technology, 18 Hoang Quoc Viet, Cau Giay,  
Hanoi 100000, Vietnam

\* Correspondence: chuhoangha@ibt.ac.vn; Tel.: +84-2437562790

## Supplementary

Table S1. The gene sequences involved in nitrogen metabolism in 33 genomes.

[illegible]

[illegible]



|   |                                            |                                                                                      |   |   |   |   |   |   |   |   |   |   |   |   |   |   |   |   |   |   |   |   |   |   |   |   |   |   |   |   |   |
|---|--------------------------------------------|--------------------------------------------------------------------------------------|---|---|---|---|---|---|---|---|---|---|---|---|---|---|---|---|---|---|---|---|---|---|---|---|---|---|---|---|---|
| 8 | Denitrifying<br>reductase gene<br>clusters | Nitrous oxide reductase<br>maturation protein NosD                                   | 0 | 0 | 0 | 0 | 0 | 0 | 0 | 0 | 0 | 1 | 0 | 0 | 0 | 0 | 0 | 0 | 0 | 0 | 0 | 0 | 0 | 1 | 0 | 0 | 0 | 0 | 0 | 0 | 0 |
|   |                                            | Nitrous oxide reductase<br>maturation protein NosF<br>(ATPase)                       | 0 | 0 | 0 | 0 | 0 | 0 | 0 | 0 | 0 | 1 | 0 | 0 | 0 | 0 | 0 | 0 | 0 | 0 | 0 | 0 | 0 | 1 | 0 | 0 | 0 | 0 | 0 | 0 | 0 |
|   |                                            | Nitrous oxide reductase<br>maturation protein NosR                                   | 0 | 0 | 0 | 0 | 0 | 0 | 0 | 0 | 0 | 1 | 0 | 0 | 0 | 0 | 0 | 0 | 0 | 0 | 0 | 0 | 0 | 1 | 0 | 0 | 0 | 0 | 0 | 0 | 0 |
|   |                                            | Nitrous oxide reductase<br>maturation protein, outer<br>membrane lipoprotein<br>NosL | 0 | 0 | 0 | 0 | 0 | 0 | 0 | 0 | 0 | 1 | 0 | 0 | 0 | 0 | 0 | 0 | 0 | 0 | 0 | 0 | 0 | 1 | 0 | 0 | 0 | 0 | 0 | 0 | 0 |
|   |                                            | Nitrous oxide reductase<br>maturation transmembrane<br>protein NosY                  | 0 | 0 | 0 | 0 | 0 | 0 | 0 | 0 | 0 | 1 | 0 | 0 | 0 | 0 | 0 | 0 | 0 | 0 | 0 | 0 | 0 | 1 | 0 | 0 | 0 | 0 | 0 | 0 | 0 |
|   |                                            | Nitrous oxide reductase (EC<br>1.7.99.6)                                             | 0 | 0 | 0 | 0 | 0 | 0 | 0 | 0 | 0 | 1 | 0 | 0 | 0 | 0 | 0 | 0 | 0 | 0 | 0 | 0 | 0 | 1 | 0 | 0 | 0 | 0 | 0 | 0 | 0 |
|   |                                            | Nitric oxide responding<br>transcriptional regulator<br>Dnr (Crp/Fnr family)         | 0 | 0 | 0 | 0 | 0 | 0 | 0 | 0 | 0 | 0 | 0 | 0 | 0 | 0 | 0 | 0 | 0 | 0 | 0 | 0 | 0 | 1 | 0 | 0 | 0 | 0 | 0 | 0 | 0 |
|   |                                            | Copper containing nitrite<br>reductase (EC 1.7.2.1)                                  | 0 | 1 | 0 | 0 | 1 | 0 | 0 | 0 | 0 | 0 | 0 | 0 | 0 | 0 | 0 | 0 | 0 | 0 | 0 | 0 | 0 | 0 | 0 | 0 | 0 | 0 | 0 | 0 | 0 |
|   |                                            | Nitrate/nitrite transporter<br>NarK                                                  | 0 | 0 | 0 | 0 | 0 | 0 | 0 | 0 | 0 | 1 | 0 | 0 | 0 | 0 | 0 | 0 | 0 | 0 | 0 | 0 | 0 | 1 | 0 | 0 | 0 | 0 | 1 | 0 | 0 |
|   |                                            | Nitric oxide responding<br>transcriptional regulator<br>NnrA (Crp/Fnr family)        | 0 | 0 | 0 | 0 | 0 | 0 | 0 | 0 | 0 | 1 | 0 | 0 | 0 | 0 | 0 | 0 | 0 | 0 | 0 | 0 | 0 | 1 | 0 | 0 | 0 | 0 | 0 | 0 | 0 |
|   |                                            | Respiratory nitrate<br>reductase alpha chain (EC<br>1.7.99.4)                        | 0 | 0 | 0 | 0 | 0 | 0 | 0 | 0 | 0 | 1 | 0 | 0 | 0 | 0 | 0 | 0 | 0 | 0 | 0 | 0 | 0 | 1 | 0 | 0 | 0 | 0 | 1 | 0 | 0 |
|   |                                            | Respiratory nitrate<br>reductase beta chain (EC<br>1.7.99.4)                         | 0 | 0 | 0 | 0 | 0 | 0 | 0 | 0 | 0 | 1 | 0 | 0 | 0 | 0 | 0 | 0 | 0 | 0 | 0 | 0 | 0 | 1 | 0 | 0 | 0 | 0 | 1 | 0 | 0 |
|   |                                            | Respiratory nitrate<br>reductase delta chain (EC<br>1.7.99.4)                        | 0 | 0 | 0 | 0 | 0 | 0 | 0 | 0 | 0 | 1 | 0 | 0 | 0 | 0 | 0 | 0 | 0 | 0 | 0 | 0 | 0 | 1 | 0 | 0 | 0 | 0 | 1 | 0 | 0 |
|   |                                            | Respiratory nitrate<br>reductase gamma chain (EC<br>1.7.99.4)                        | 0 | 0 | 0 | 0 | 0 | 0 | 0 | 0 | 0 | 1 | 0 | 0 | 0 | 0 | 0 | 0 | 0 | 0 | 0 | 0 | 0 | 1 | 0 | 0 | 0 | 0 | 1 | 0 | 0 |
|   |                                            | Nitric oxide reductase<br>activation protein NorF                                    | 0 | 0 | 0 | 0 | 0 | 0 | 0 | 0 | 0 | 0 | 0 | 0 | 0 | 0 | 0 | 0 | 0 | 0 | 0 | 0 | 0 | 1 | 0 | 0 | 0 | 0 | 0 | 0 | 0 |

Table S2. BPGA analysis.

| Number | Organism name                                         | Number of<br>core genes | Number of<br>accessory genes | Number of<br>unique genes | Number of<br>absent genes | exclusively |
|--------|-------------------------------------------------------|-------------------------|------------------------------|---------------------------|---------------------------|-------------|
| 1      | <i>P. entomophila</i> L48                             |                         | 1929                         | 2501                      | 441                       | 3           |
| 2      | <i>P. fluorescens</i> A506                            |                         | 1929                         | 2744                      | 506                       | 12          |
| 3      | <i>P. fluorescens</i> F113                            |                         | 1929                         | 3050                      | 752                       | 5           |
| 4      | <i>P. fluorescens</i> NCIMB 11764                     |                         | 1929                         | 3219                      | 799                       | 2           |
| 5      | <i>P. fluorescens</i> Pf0 1                           |                         | 1929                         | 3029                      | 503                       | 1           |
| 6      | <i>P. fluorescens</i> SBW25                           |                         | 1929                         | 3254                      | 561                       | 8           |
| 7      | <i>P. knackmussii</i> B13                             |                         | 1929                         | 1835                      | 1557                      | 245         |
| 8      | <i>P. protegens</i> Pf 5                              |                         | 1929                         | 3179                      | 907                       | 7           |
| 9      | <i>P. putida</i> BIRD 1                               |                         | 1929                         | 2838                      | 184                       | 0           |
| 10     | <i>P. putida</i> DLL E4                               |                         | 1929                         | 2947                      | 229                       | 0           |
| 11     | <i>P. putida</i> E41                                  |                         | 1929                         | 2899                      | 287                       | 2           |
| 12     | <i>P. putida</i> F1                                   |                         | 1929                         | 3015                      | 110                       | 0           |
| 13     | <i>P. putida</i> GB 1                                 |                         | 1929                         | 2971                      | 290                       | 1           |
| 14     | <i>P. putida</i> H8234                                |                         | 1929                         | 3480                      | 460                       | 0           |
| 15     | <i>P. putida</i> HB3267 PC9                           |                         | 1929                         | 2931                      | 241                       | 2           |
| 16     | <i>P. putida</i> KF715                                |                         | 1929                         | 3339                      | 263                       | 1           |
| 17     | <i>P. putida</i> KT2440                               |                         | 1929                         | 3040                      | 294                       | 0           |
| 18     | <i>P. putida</i> NBRC 14164                           |                         | 1929                         | 3048                      | 177                       | 1           |
| 19     | <i>P. putida</i> ND6                                  |                         | 1929                         | 3097                      | 149                       | 1           |
| 20     | <i>P. putida</i> PC2                                  |                         | 1929                         | 2597                      | 425                       | 3           |
| 21     | <i>P. putida</i> S12                                  |                         | 1929                         | 2901                      | 61                        | 0           |
| 22     | <i>P. putida</i> S16                                  |                         | 1929                         | 3005                      | 151                       | 0           |
| 23     | <i>P. putida</i> W619                                 |                         | 1929                         | 2720                      | 334                       | 4           |
| 24     | <i>P. savastanoi</i> pv. <i>savastanoi</i> NCPPB 3335 |                         | 1929                         | 2739                      | 349                       | 15          |

|    |                                                     |      |      |     |    |
|----|-----------------------------------------------------|------|------|-----|----|
| 25 | <i>P. syringae</i> CC1557                           | 1929 | 2601 | 297 | 12 |
| 26 | <i>P. syringae</i> pv. <i>actinidiae</i> ICMP 9853  | 1929 | 2911 | 203 | 2  |
| 27 | <i>P. syringae</i> pv. <i>actinidiae</i> ICMP 18884 | 1929 | 2972 | 296 | 1  |
| 28 | <i>P. syringae</i> pv. <i>syringae</i> B728a        | 1929 | 2929 | 144 | 0  |
| 29 | <i>P. syringae</i> pv. <i>syringae</i> HS191        | 1929 | 2810 | 193 | 3  |
| 30 | <i>P. syringae</i> pv <i>syringae</i> B301D         | 1929 | 2897 | 164 | 1  |
| 31 | <i>P. syringae</i> UMAF0158                         | 1929 | 2749 | 155 | 0  |
| 32 | TT321                                               | 1929 | 2899 | 1   | 0  |
| 33 | TT322                                               | 1929 | 2900 | 2   | 0  |

Table S3. The number of Genome Islands (GIs) in 33 genomes.

| Number | Organism                                              | Number of GIs |
|--------|-------------------------------------------------------|---------------|
| 1      | <i>P. putida</i> TT321                                | 28            |
| 2      | <i>P. putida</i> TT322                                | 27            |
| 3      | <i>P. fluorescens</i> F113                            | 81            |
| 4      | <i>P. fluorescens</i> SBW25                           | 132           |
| 5      | <i>P. putida</i> BIRD 1                               | 80            |
| 6      | <i>P. putida</i> F1                                   | 91            |
| 7      | <i>P. putida</i> GB 1                                 | 68            |
| 8      | <i>P. putida</i> H8234                                | 151           |
| 9      | <i>P. putida</i> DLL E4                               | 107           |
| 10     | <i>P. putida</i> KT2440                               | 114           |
| 11     | <i>P. putida</i> NBRC 14164                           | 70            |
| 12     | <i>P. putida</i> PC2                                  | 63            |
| 13     | <i>P. putida</i> S16                                  | 93            |
| 14     | <i>P. putida</i> W619                                 | 90            |
| 15     | <i>P. syringae</i> pv. <i>syringae</i> B301D          | 72            |
| 16     | <i>P. syringae</i> pv. <i>syringae</i> B728a          | 70            |
| 17     | <i>P. entomophila</i> L48                             | 93            |
| 18     | <i>P. fluorescens</i> A506                            | 61            |
| 19     | <i>P. fluorescens</i> NCIMB 11764                     | 147           |
| 20     | <i>P. fluorescens</i> Pf0 1                           | 64            |
| 21     | <i>P. knackmussii</i> B13                             | 96            |
| 22     | <i>P. protegens</i> Pf 5                              | 40            |
| 23     | <i>P. putida</i> E41                                  | 88            |
| 24     | <i>P. putida</i> HB3267                               | 80            |
| 25     | <i>P. putida</i> KF715                                | 107           |
| 26     | <i>P. putida</i> ND6                                  | 93            |
| 27     | <i>P. putida</i> S12                                  | 89            |
| 28     | <i>P. savastanoi</i> pv. <i>savastanoi</i> NCPPB 3335 | 86            |
| 29     | <i>P. syringae</i> CC1557                             | 54            |
| 30     | <i>P. syringae</i> pv. <i>actinidiae</i> ICMP 9853    | 96            |
| 31     | <i>P. syringae</i> pv. <i>actinidiae</i> ICMP 18884   | 113           |
| 32     | <i>P. syringae</i> pv. <i>syringae</i> HS191          | 165           |
| 33     | <i>P. syringae</i> UMAF0158                           | 47            |



Table S4. The integrated genomic islands on TT321.

| Number | Start     | End       | Size   |
|--------|-----------|-----------|--------|
| 1      | 116,946   | 123,443   | 6,497  |
| 2      | 116,946   | 162,645   | 45,699 |
| 3      | 295,965   | 308,844   | 12,879 |
| 4      | 569,558   | 587,468   | 17,910 |
| 5      | 580,722   | 587,468   | 6,746  |
| 6      | 603,821   | 609,715   | 5,894  |
| 7      | 863,516   | 910,902   | 47,386 |
| 8      | 866,355   | 873,222   | 6,867  |
| 9      | 884,046   | 893,083   | 9,037  |
| 10     | 903,733   | 913,104   | 9,371  |
| 11     | 1,169,928 | 1,176,099 | 6,171  |
| 12     | 1,900,946 | 1,906,645 | 5,699  |
| 13     | 1,927,936 | 1,964,863 | 36,927 |
| 14     | 1,940,036 | 1,945,671 | 5,635  |
| 15     | 1,946,552 | 1,953,146 | 6,594  |
| 16     | 2,396,815 | 2,408,209 | 11,394 |
| 17     | 2,638,646 | 2,663,508 | 24,862 |
| 18     | 3,095,323 | 3,101,169 | 5,846  |
| 19     | 3,181,599 | 3,186,986 | 5,387  |
| 20     | 3,194,208 | 3,198,505 | 4,297  |
| 21     | 3,875,453 | 3,889,420 | 13,967 |
| 22     | 3,959,861 | 3,976,263 | 16,402 |
| 23     | 3,961,064 | 3,966,047 | 4,983  |
| 24     | 4,298,394 | 4,308,693 | 10,299 |
| 25     | 4,303,122 | 4,318,979 | 15,857 |
| 26     | 4,693,660 | 4,710,876 | 17,216 |
| 27     | 4,697,630 | 4,705,902 | 8,272  |
| 28     | 5,431,241 | 5,448,714 | 17,473 |
| 29     | 5,583,173 | 5,588,433 | 5,260  |

Table S5. The integrated genomic islands on TT322.

| Number | Start     | End       | Size   |
|--------|-----------|-----------|--------|
| 1      | 116,946   | 123,443   | 6,497  |
| 2      | 116,946   | 162,645   | 45,699 |
| 3      | 295,965   | 308,844   | 12,879 |
| 4      | 568,666   | 586,576   | 17,910 |
| 5      | 579,830   | 586,576   | 6,746  |
| 6      | 602,929   | 608,823   | 5,894  |
| 7      | 863,505   | 910,891   | 47,386 |
| 8      | 866,344   | 873,211   | 6,867  |
| 9      | 884,035   | 893,072   | 9,037  |
| 10     | 903,722   | 913,093   | 9,371  |
| 11     | 1,169,964 | 1,176,135 | 6,171  |
| 12     | 1,900,949 | 1,906,648 | 5,699  |
| 13     | 1,927,939 | 1,964,986 | 37,047 |
| 14     | 1,940,039 | 1,945,674 | 5,635  |
| 15     | 1,946,555 | 1,953,149 | 6,594  |
| 16     | 2,412,604 | 2,423,998 | 11,394 |
| 17     | 2,653,574 | 2,678,439 | 24,865 |
| 18     | 3,111,237 | 3,116,190 | 4,953  |
| 19     | 3,196,620 | 3,202,007 | 5,387  |
| 20     | 3,887,204 | 3,901,171 | 13,967 |
| 21     | 3,971,612 | 3,988,014 | 16,402 |
| 22     | 3,972,815 | 3,977,798 | 4,983  |
| 23     | 4,292,268 | 4,302,567 | 10,299 |
| 24     | 4,296,996 | 4,312,853 | 15,857 |
| 25     | 4,687,298 | 4,704,514 | 17,216 |
| 26     | 4,691,268 | 4,699,540 | 8,272  |
| 27     | 5,424,949 | 5,442,422 | 17,473 |
| 28     | 5,610,705 | 5,615,449 | 4,744  |

Table S6. The presence of arginase, carbamoyl phosphate synthetase I and carbamate kinase in 33 genomes.

| Number | Name                                                  | Arginase | Cpsl | Carbamate kinase |
|--------|-------------------------------------------------------|----------|------|------------------|
| 1      | <i>P. fluorescens</i> F113                            | -        | -    | +                |
| 2      | TT321                                                 | -        | -    | +                |
| 3      | TT322                                                 | -        | -    | +                |
| 4      | <i>P. fluorescens</i> SBW25                           | +        |      | +                |
| 5      | <i>P. putida</i> BIRD 1                               | -        | -    | +                |
| 6      | <i>P. putida</i> F1                                   | -        | -    | +                |
| 7      | <i>P. putida</i> GB 1                                 | -        | -    | +                |
| 8      | <i>P. putida</i> H8234                                | -        | -    | +                |
| 9      | <i>P. putida</i> DLL E4                               | -        | -    | +                |
| 10     | <i>P. putida</i> KT2440                               | -        | -    | +                |
| 11     | <i>P. putida</i> NBRC 14164                           | -        | -    | +                |
| 12     | <i>P. putida</i> PC2                                  | -        | -    | +                |
| 13     | <i>P. putida</i> S16                                  | -        | -    | +                |
| 14     | <i>P. putida</i> W619                                 | -        | -    | +                |
| 15     | <i>P. syringae</i> pv. <i>syringae</i> B301D          | +        | -    | -                |
| 16     | <i>P. syringae</i> pv. <i>syringae</i> B728a          | +        | -    | +                |
| 17     | <i>P. entomophila</i> L48                             |          | -    | +                |
| 18     | <i>P. fluorescens</i> A506                            | +        | -    | +                |
| 19     | <i>P. fluorescens</i> NCIMB 11764                     | -        | -    | +                |
| 20     | <i>P. fluorescens</i> Pf0 1                           | -        | -    | +                |
| 21     | <i>P. knackmussii</i> B13                             | -        | -    | +                |
| 22     | <i>P. protegens</i> Pf 5                              | +        | -    | +                |
| 23     | <i>P. putida</i> E41                                  | -        | -    | +                |
| 24     | <i>P. putida</i> HB3267 PC9                           | -        | -    | +                |
| 25     | <i>P. putida</i> KF715                                | -        | -    | +                |
| 26     | <i>P. putida</i> ND6                                  | -        | -    | +                |
| 27     | <i>P. putida</i> S12                                  | -        | -    | +                |
| 28     | <i>P. savastanoi</i> pv. <i>savastanoi</i> NCPPB 3335 | -        | -    | -                |
| 29     | <i>P. syringae</i> CC1557                             | -        | -    | +                |
| 30     | <i>P. syringae</i> pv. <i>actinidiae</i> ICMP 9853    | -        | -    | -                |
| 31     | <i>P. syringae</i> pv. <i>actinidiae</i> ICMP 18884   | -        | -    | -                |
| 32     | <i>P. syringae</i> pv. <i>syringae</i> HS191          | -        | -    | -                |
| 33     | <i>P. syringae</i> UMAF0158                           | +        | -    | -                |
